# Supplementary material for: Flax-Derived Carbon: A Highly Durable Electrode Material for Electrochemical Double-Layer Supercapacitors
Source: MDPI journal article supplement (doi:10.3390/nano11092229), 2021-08-29
Supplement: s1 [file s1]

# Supporting Information

## Flax-Derived Carbon: A Highly Durable Electrode Material for Electrochemical Double-Layer Supercapacitors

Petr Jakubec <sup>1,\*,†</sup>, Stanislav Bartusek <sup>2,†</sup>, Josef Jan Dvořáček <sup>2</sup>, Veronika Šedajová <sup>1,3</sup>, Vojtěch Kupka <sup>1</sup>  
and Michal Otyepka <sup>1,\*</sup>

<sup>1</sup> Czech Advanced Technology and Research Institute (CATRIN), Regional Centre of Advanced Technologies and Materials (RCPTM), Palacký University Olomouc, Šlechtitelů 27, 783 71 Olomouc, Czech Republic; veronika.sedajova@upol.cz (V.Š.); vojtech.kupka@upol.cz (V.K.)

<sup>2</sup> Department of Environmental Protection in Industry, Faculty of Materials Science and Technology, VSB- Technical University of Ostrava, 17. Listopadu 2172/15, 708 00 Ostrava-Poruba, Czech Republic; stanislav.bartusek@vsb.cz (S.B.); jdvoracek@solitaire.cz (J.J.D.)

<sup>3</sup> Department of Physical Chemistry, Faculty of Science, Palacký University, 17. Listopadu 1192/12, 779 00 Olomouc, Czech Republic

\* Correspondence: p.jakubec@upol.cz (P.J.); michal.otyepka@upol.cz (M.O.); Tel.: +420-585-634-474 (P.J.); +420-585-634-764 (M.O.)

† These authors contributed equally to this work.

**Table S1.** Electrochemical performance of various activated carbons prepared from different biomass sources.

| Sample Name | Biomass Precursor | Activating agent | Electrolyte                           | Electrode System | Cs [F/g]       | Stability [cycles]    | E [Wh/kg] | P [W/kg] | Ref          |
|-------------|-------------------|------------------|---------------------------------------|------------------|----------------|-----------------------|-----------|----------|--------------|
| C-Flax      | flax              | KOH              | 1 M H <sub>2</sub> SO <sub>4</sub>    | 3                | 500 (0.25 A/g) | —                     | —         | —        | this work    |
| C-Flax      | flax              | KOH              | 1 M H <sub>2</sub> SO <sub>4</sub>    | 2                | 189 (0.5 A/g)  | 85% (150 000 @ 5 A/g) | 6.58      | 250      | this work    |
| CFC         | flax textile      | N/A              | 0.1 M Na <sub>2</sub> SO <sub>4</sub> | 2                | 1.56 (0.1 A/g) | 100% (10 000 @ 5 A/g) | —         | —        | <sup>1</sup> |
| FF-850      | flax fabric       | N/A              | 1 M H <sub>2</sub> SO <sub>4</sub>    | 2                | 12.7 (2 mV/s)  | N/A                   | —         | —        | <sup>2</sup> |

|                  |                      |                                |                                      |   |                 |                          |      |      |    |
|------------------|----------------------|--------------------------------|--------------------------------------|---|-----------------|--------------------------|------|------|----|
| <b>CF-850</b>    | cotton fabric        | N/A                            | 1 M H <sub>2</sub> SO <sub>4</sub>   | 2 | 21.1 (2 mV/s)   | N/A                      | —    | —    | 2  |
| <b>CF-CNT</b>    | flax fabric          | N/A                            | 6 M KOH                              | 3 | 34 (1 A/g)      | N/A                      | —    | —    | 3  |
| <b>KHC</b>       | banana stem          | KOH                            | 6 M KOH                              | 3 | 479.23 (1 mV/s) | 72.88% (6000 @ 1 A/g)    | —    | —    | 4  |
| <b>PHC</b>       | banana stem          | H <sub>3</sub> PO <sub>4</sub> | 6 M KOH                              | 3 | 202.11 (2mV/s)  | —                        | —    | —    | 4  |
| <b>CHC</b>       | corn-cob             | N/A                            | 6 M KOH                              | 3 | 309.81 (2 mV/s) | —                        | —    | —    | 4  |
| <b>SHC</b>       | potato starch        | N/A                            | 6 M KOH                              | 3 | 99.9 (2 mV/s)   | —                        | —    | —    | 4  |
| <b>MC-800</b>    | acacia gum           | KOH                            | 6 M KOH                              | 3 | 272 (1 A/g)     | 93% (1000 @ 1 A/g)       | —    | —    | 5  |
| <b>MC-800</b>    | acacia gum           | KOH                            | 6 M KOH                              | 2 | 223 (1 A/g)     |                          | 7.76 | 500  | 5  |
| <b>AC-700-15</b> | sunflower seed shell | KOH                            | 30% KOH                              | 2 | 244 (0.25 A/g)  | —                        | 4.8  | 2400 | 6  |
| <b>PC4/1-C</b>   | rice husk            | ZnCl <sub>2</sub>              | 6 M KOH                              | 2 | 233 (2 A/g)     | 99% (1000 @ 0.05 A/g)    | 8.36 | N/A  | 7  |
| <b>PC4/1-C</b>   | rice husk            | ZnCl <sub>2</sub>              | 6 M KOH                              | 2 | 242 (2 mV/s)    | —                        | —    | —    | 7  |
| <b>N1</b>        | rice husk            | NaOH                           | 3 M KCl                              | 2 | 210 (0.2 mA)    | —                        | —    | —    | 8  |
| <b>AC-900</b>    | carrageenan          | KOH                            | 6 M KOH                              | 3 | 230 (1 A/g)     | 95% (1000 @ 1 A/g)       | —    | —    | 9  |
| <b>TWPC</b>      | tea                  | KOH                            | 6 M KOH                              | 3 | 332 (1 A/g)     | 99.4% (100000 @ 20 A/g)  | —    | —    | 10 |
| <b>N-SAC-3</b>   | shaddock peel        | KOH                            | 6 M KOH                              | 3 | 325 (1 A/g)     | 89.8% (10000 @ 100 mV/s) | —    | —    | 11 |
| <b>C-750</b>     | waste coffee ground  | CO <sub>2</sub>                | 5 M KOH                              | 3 | 190 (5 mV/s)    | 92% (2000 @ 1 A/g)       | —    | —    | 12 |
| —                | firwoods             | steam                          | 0.5 M H <sub>2</sub> SO <sub>4</sub> | 3 | 118 (10 A/g)    | —                        | —    | —    | 13 |

## References

1. He, S.; Chen, W. Application of Biomass-Derived Flexible Carbon Cloth Coated with MnO<sub>2</sub> Nanosheets in Supercapacitors. *J. Power Sources* **2015**, *294*, 150–158.
2. Xiao, P.-W.; Meng, Q.; Zhao, L.; Li, J.-J.; Wei, Z.; Han, B.-H. Biomass-Derived Flexible Porous Carbon Materials and Their Applications in Supercapacitor and Gas Adsorption. *Mater. Des.* **2017**, *129*, 164–172.
3. Zhang, Y.; Mao, T.; Wu, H.; Cheng, L.; Zheng, L. Carbon Nanotubes Grown on Flax Fabric as Hierarchical All-Carbon Flexible Electrodes for Supercapacitors. *Adv. Mater. Interfaces* **2017**, *4* (9), 1601123.

4. Ghosh, S.; Santhosh, R.; Jeniffer, S.; Raghavan, V.; Jacob, G.; Nanaji, K.; Kollu, P.; Jeong, S. K.; Grace, A. N. Natural Biomass Derived Hard Carbon and Activated Carbons as Electrochemical Supercapacitor Electrodes. *Sci. Rep.* **2019**, *9* (1), 16315.
5. Fan, Y.; Liu, P.; Zhu, B.; Chen, S.; Yao, K.; Han, R. Microporous Carbon Derived from Acacia Gum with Tuned Porosity for High-Performance Electrochemical Capacitors. *Int. J. Hydrog. Energy* **2015**, *40* (18), 6188–6196.
6. Li, X.; Xing, W.; Zhuo, S.; Zhou, J.; Li, F.; Qiao, S.-Z.; Lu, G.-Q. Preparation of Capacitor's Electrode from Sunflower Seed Shell. *Bioresour. Technol.* **2011**, *102* (2), 1118–1123.
7. He, X.; Ling, P.; Yu, M.; Wang, X.; Zhang, X.; Zheng, M. Rice Husk-Derived Porous Carbons with High Capacitance by ZnCl<sub>2</sub> Activation for Supercapacitors. *Electrochim. Acta* **2013**, *105*, 635–641.
8. Guo, Y.; Qi, J.; Jiang, Y.; Yang, S.; Wang, Z.; Xu, H. Performance of Electrical Double Layer Capacitors with Porous Carbons Derived from Rice Husk. *Mater. Chem. Phys.* **2003**, *80* (3), 704–709.
9. Fan, Y.; Yang, X.; Zhu, B.; Liu, P.-F.; Lu, H.-T. Micro-Mesoporous Carbon Spheres Derived from Carrageenan as Electrode Material for Supercapacitors. *J. Power Sources* **2014**, *268*, 584–590.
10. Khan, A.; Senthil, R. A.; Pan, J.; Osman, S.; Sun, Y.; Shu, X. A New Biomass Derived Rod-like Porous Carbon from Tea-Waste as Inexpensive and Sustainable Energy Material for Advanced Supercapacitor Application. *Electrochim. Acta* **2020**, *335*, 135588.
11. Chen, J.; Lin, Y.; Liu, J.; Wu, D.; Bai, X.; Chen, D.; Li, H. Outstanding Supercapacitor Performance of Nitrogen-Doped Activated Carbon Derived from Shaddock Peel. *J. Energy Storage* **2021**, *39*, 102640.
12. Hossain, R.; Nekouei, R. K.; Mansuri, I.; Sahajwalla, V. In-Situ O/N-Heteroatom Enriched Activated Carbon by Sustainable Thermal Transformation of Waste Coffee Grounds for Supercapacitor Material. *J. Energy Storage* **2021**, *33*, 102113.
13. Wu, F.-C.; Tseng, R.-L.; Hu, C.-C.; Wang, C.-C. Physical and Electrochemical Characterization of Activated Carbons Prepared from Firwoods for Supercapacitors. *J. Power Sources* **2004**, *138* (1–2), 351–359.
